# Supplementary material
Source: HighWire-hosted journal article supplement (https://gut.bmj.com/content/69/6/1104)

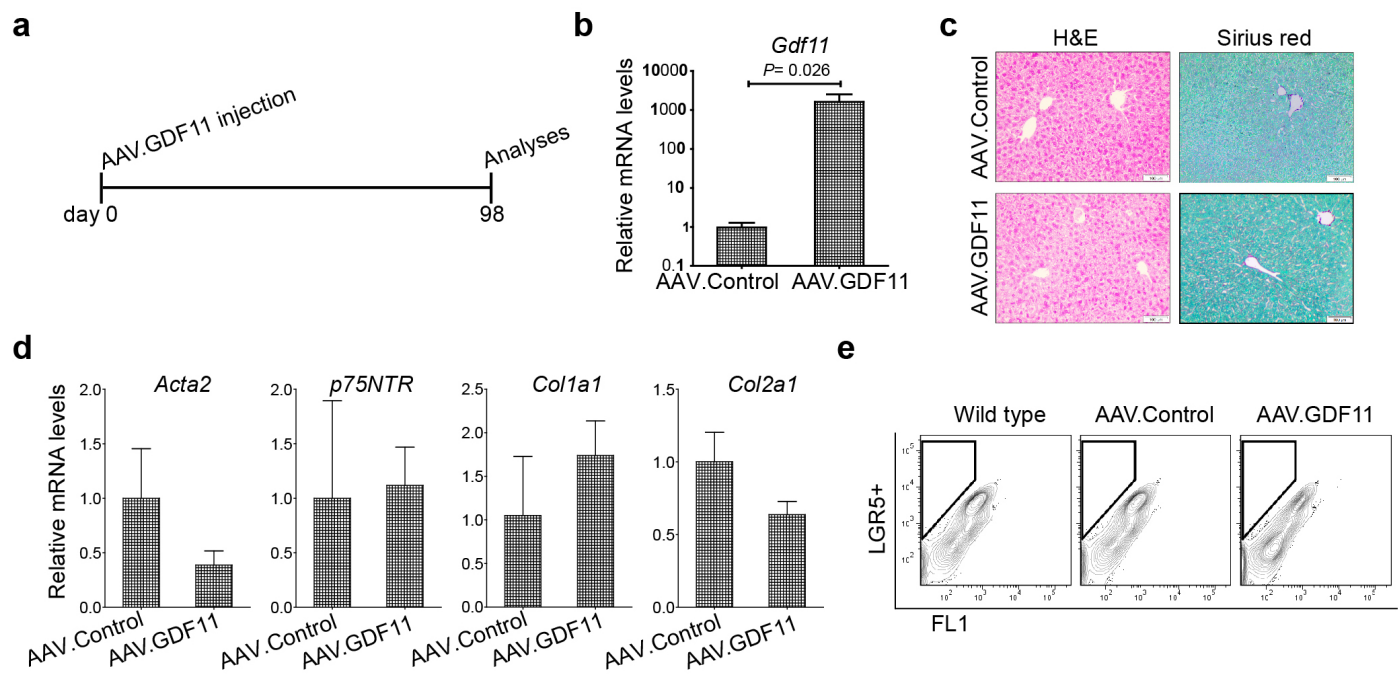

Supplementary Figure 9

Supplement: inline-supplementary-material-10 [file inline-supplementary-material-10.pdf]

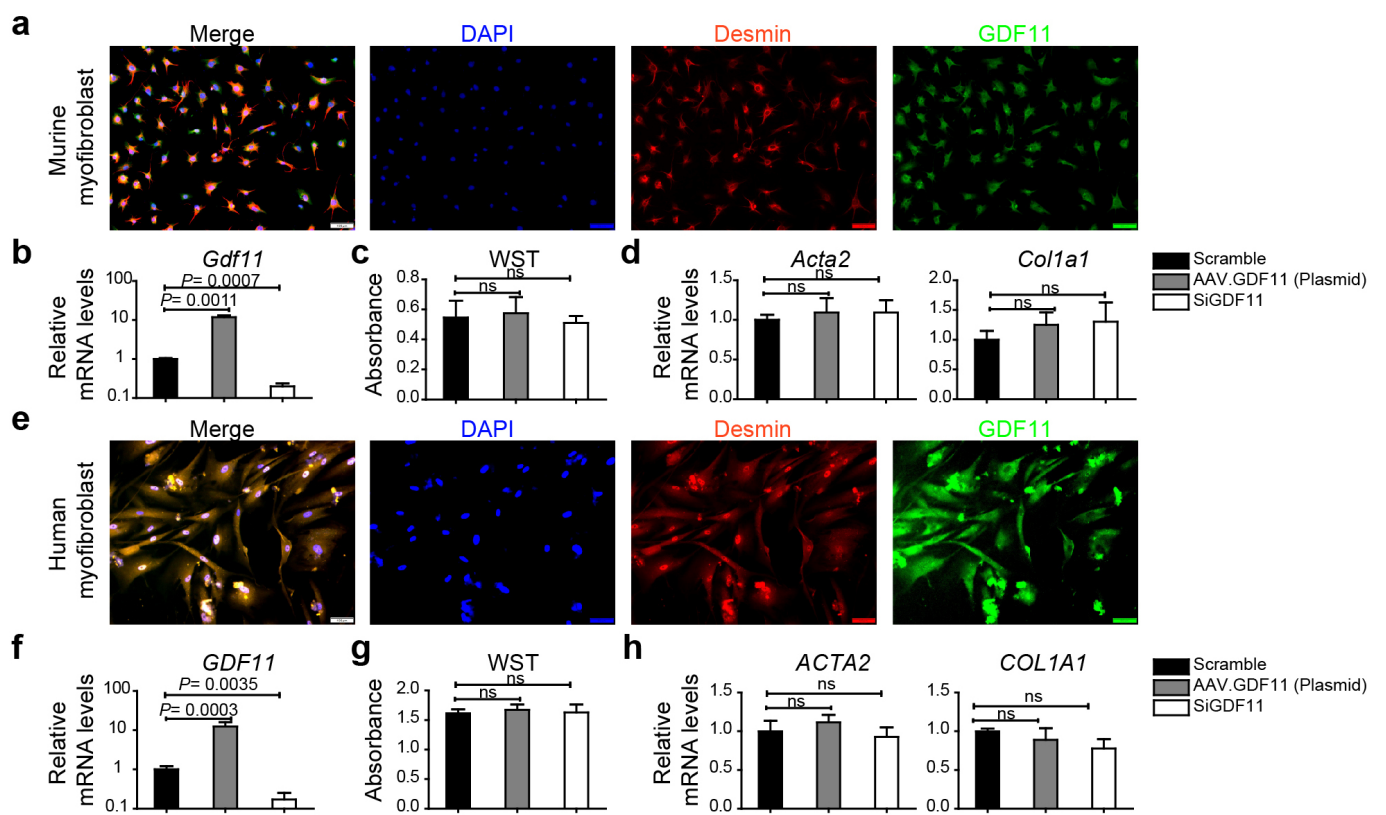

Supplementary Figure 10

Supplement: inline-supplementary-material-11 [file inline-supplementary-material-11.pdf]

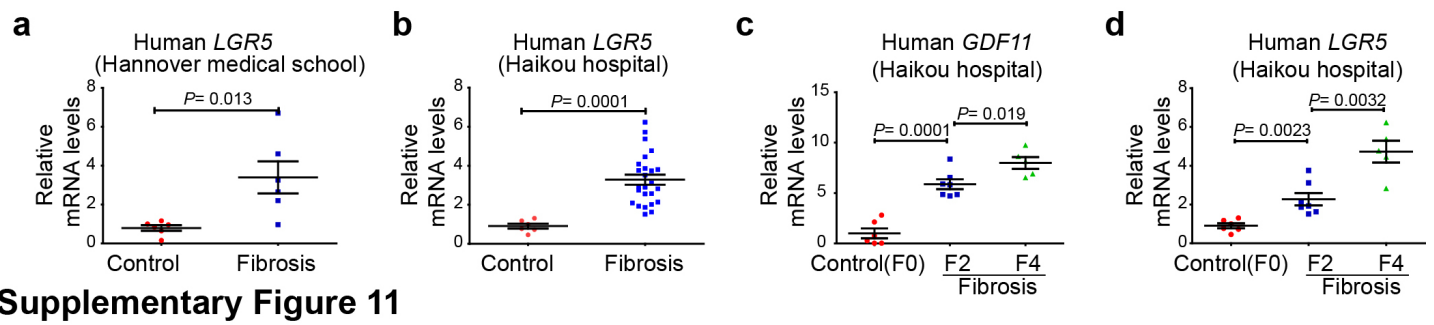

Supplementary Figure 11

Supplement: inline-supplementary-material-12 [file inline-supplementary-material-12.pdf]

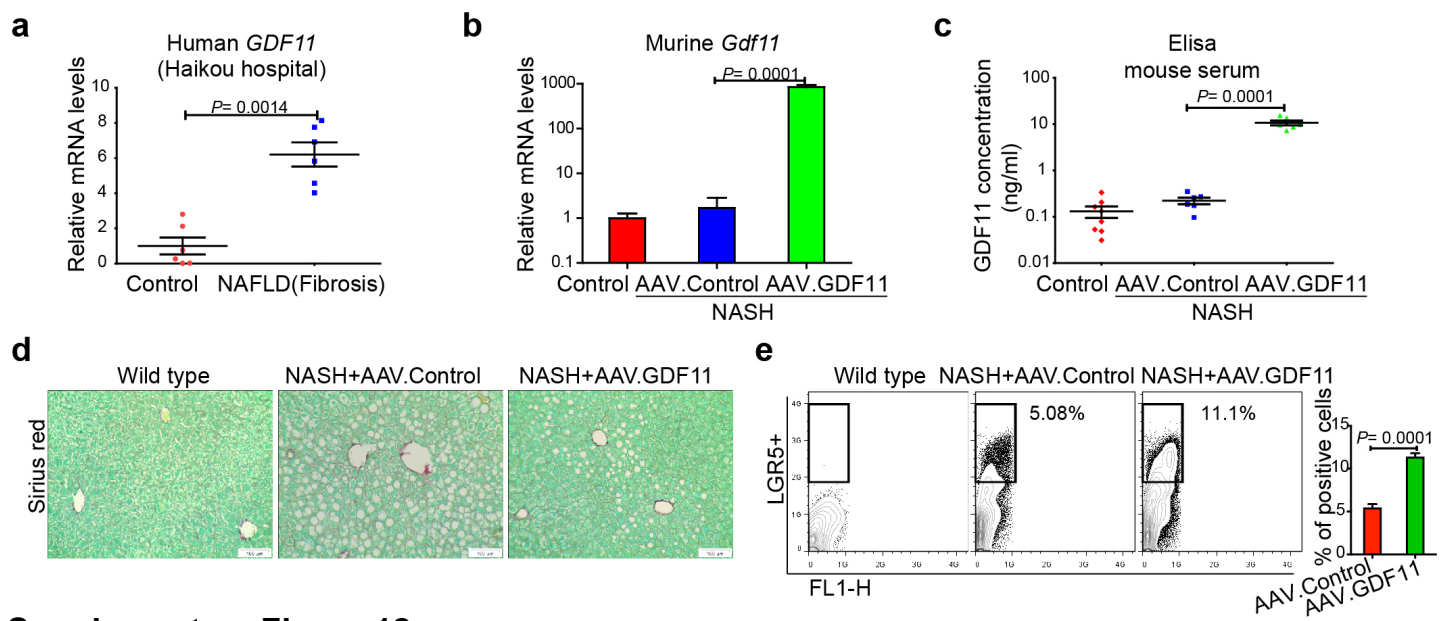

Supplementary Figure 12

Supplement: inline-supplementary-material-13 [file inline-supplementary-material-13.pdf]

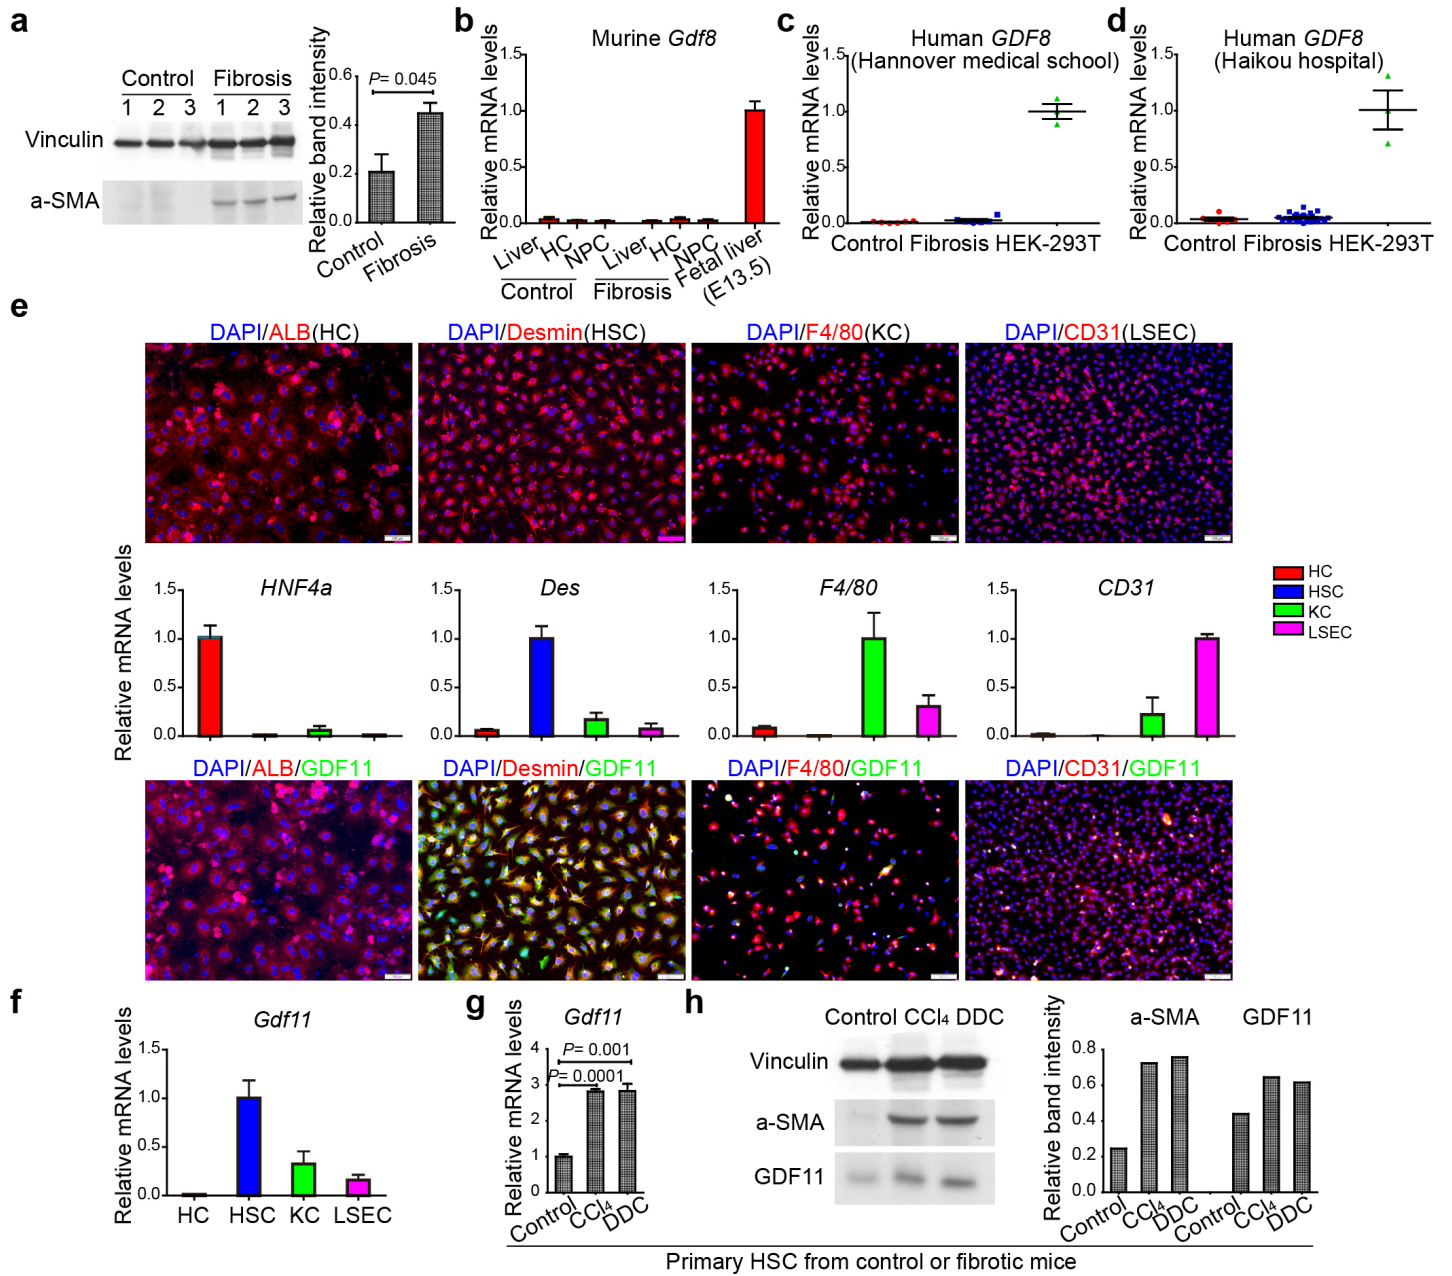

Supplementary Figure 1

Supplement: inline-supplementary-material-2 [file inline-supplementary-material-2.pdf]

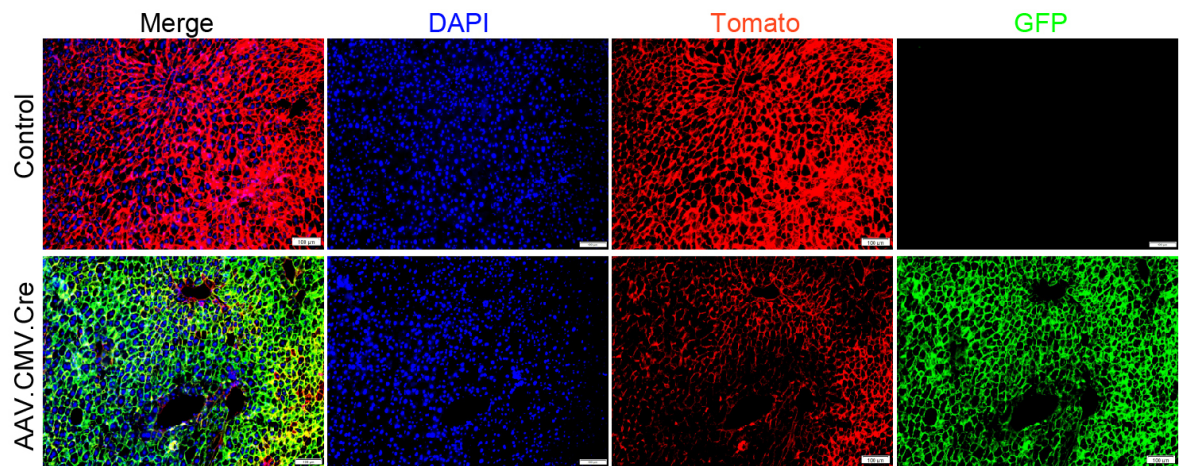

**Supplementary Figure 2**

Supplement: inline-supplementary-material-3 [file inline-supplementary-material-3.pdf]

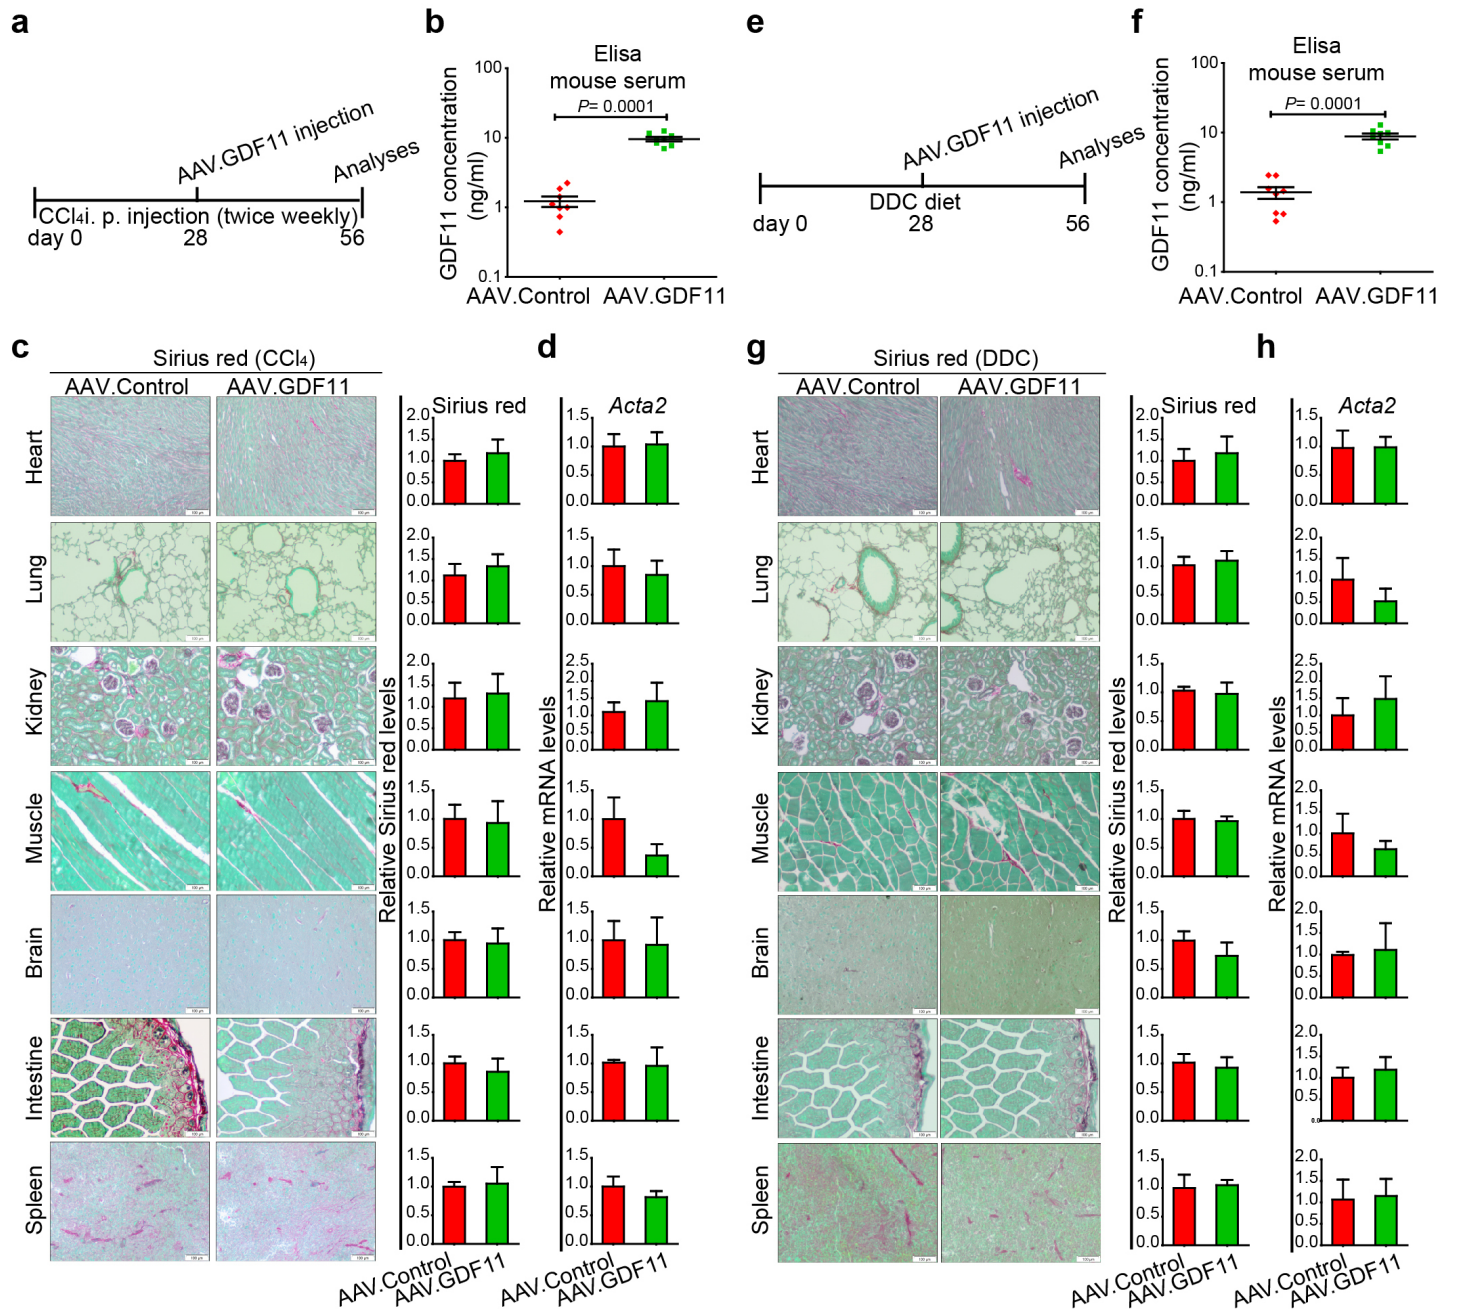

Supplementary Figure 3

Supplement: inline-supplementary-material-4 [file inline-supplementary-material-4.pdf]

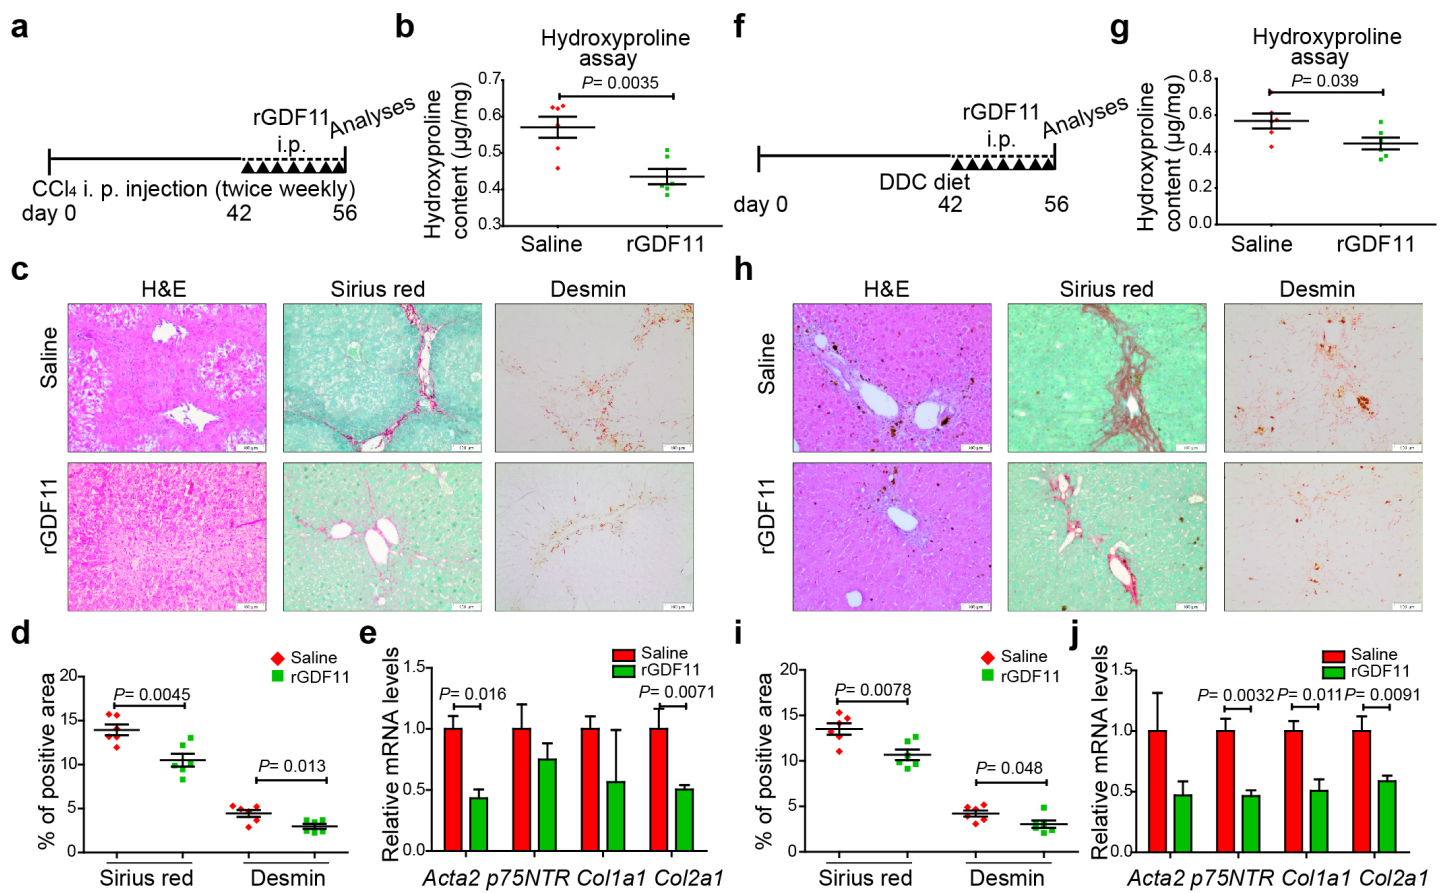

Supplementary Figure 4

Supplement: inline-supplementary-material-5 [file inline-supplementary-material-5.pdf]

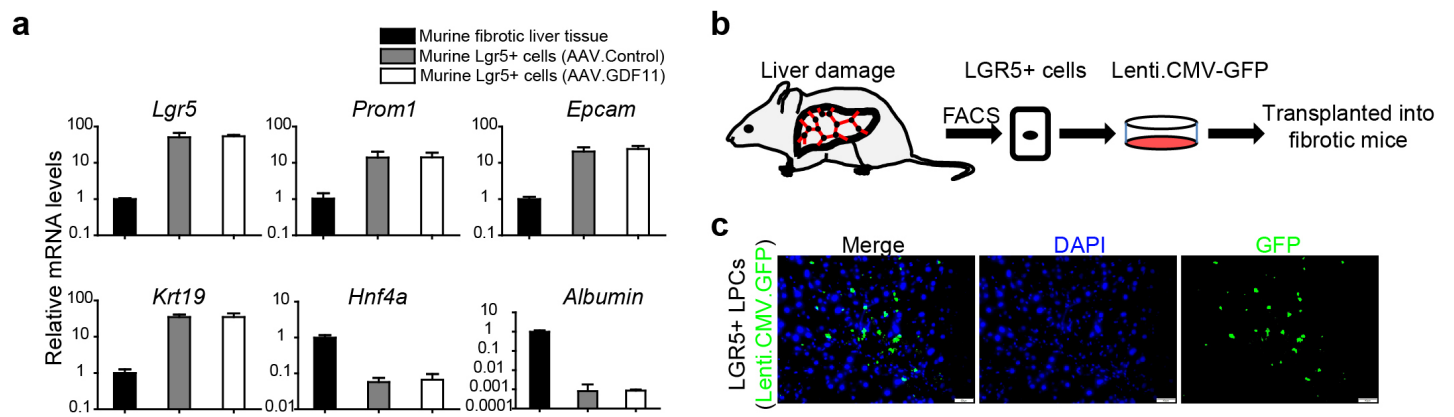

Supplementary Figure 6

Supplement: inline-supplementary-material-6 [file inline-supplementary-material-6.pdf]

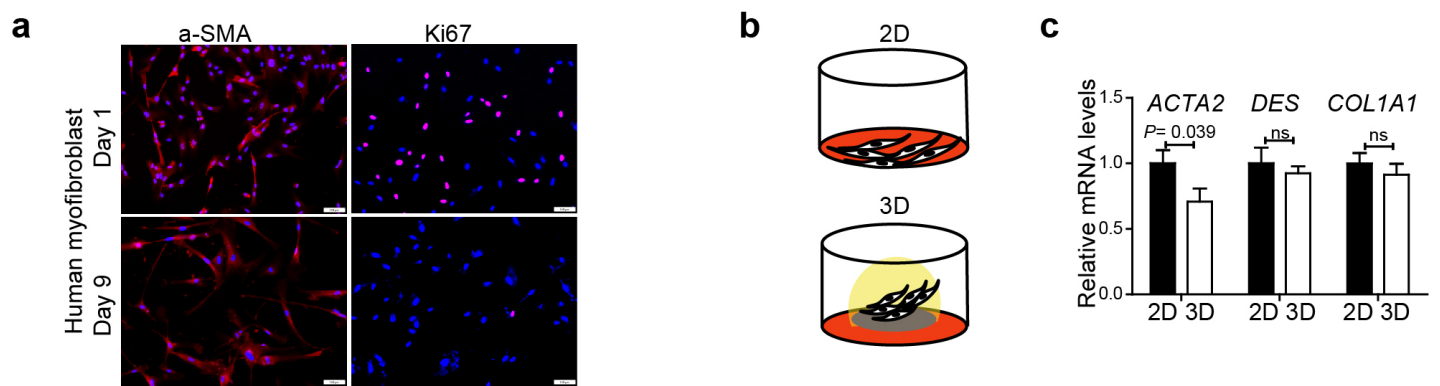

Supplementary Figure 7

Supplement: inline-supplementary-material-8 [file inline-supplementary-material-8.pdf]

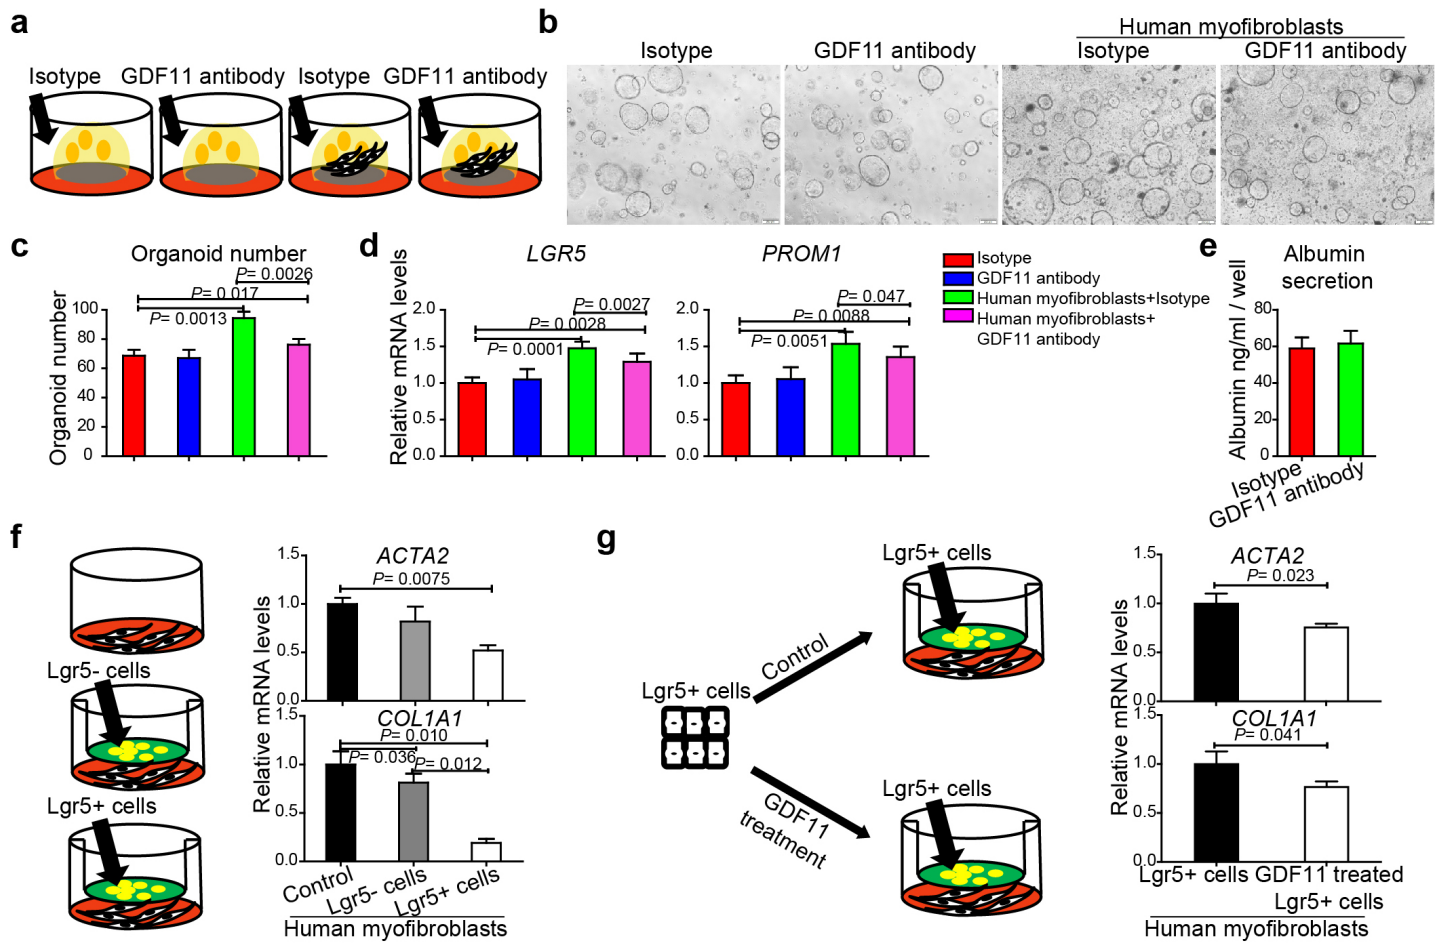

Supplementary Figure 8

Supplement: inline-supplementary-material-9 [file inline-supplementary-material-9.pdf]
